# Supplementary material
Source: PubMed Central journal article supplement (PMC7906660)
Supplement: mmc1.pdf [file mmc1.pdf]

# THE LANCET

## Infectious Diseases

### Supplementary appendix

This appendix formed part of the original submission and has been peer reviewed. We post it as supplied by the authors.

Supplement to: Peeling RW, Olliaro PL, BoerasDI, Fongwen N. Scaling up COVID-19 rapid antigen tests: promises and challenges. *Lancet Infect Dis* 2021; published online Feb 23. [https://doi.org/10.1016/S1473-3099\(21\)00048-7](https://doi.org/10.1016/S1473-3099(21)00048-7).

## Appendix

Table 1. Performance of Selected WHO Emergency Use authorised Antigen Rapid Tests

| Evaluation sites                         |     | Switzerland |      | Germany  |
|------------------------------------------|-----|-------------|------|----------|
| <b>Abbott Panbio Ag-RDT</b>              | N   | NP swabs    | N    | NP swabs |
| Clinical Sensitivity                     | 124 | 86%         | 106  | 87%      |
| - ≤7 days after symptom onset            | 111 | 86%         | 76   | 91%      |
| - High viral load (Ct value ≤25)         | 93  | 97%         | 72   | 96%      |
| - Includes low viral load (Ct value ≤33) | 116 | 90%         | 103  | 88%      |
| Clinical Specificity                     | 411 | 100%        | 1002 | 99.9%    |
|                                          |     |             |      |          |
| <b>SD Biosensor Ag-RDT</b>               | N   | Switzerland | N    | Brazil   |
| Clinical Sensitivity                     | 191 | 89%         | 106  | 87%      |
| - ≤7 days after symptom onset            | 176 | 90%         | 97   | 91%      |
| - High viral load (Ct value ≤25)         | 141 | 97%         | 49   | 96%      |
| - Includes low viral load (Ct value ≤33) | 183 | 92%         | 99   | 92%      |
| Clinical Specificity                     | 328 | 99.7%       | 294  | 98%      |
